# Supplementary material for: Quality of life up to 10 years after traumatic brain injury: a cross-sectional analysis
Source: Springer Nature journal article supplement (doi:10.1186/s12955-020-01391-3), 2020-06-04

# Supplementary Figure S1

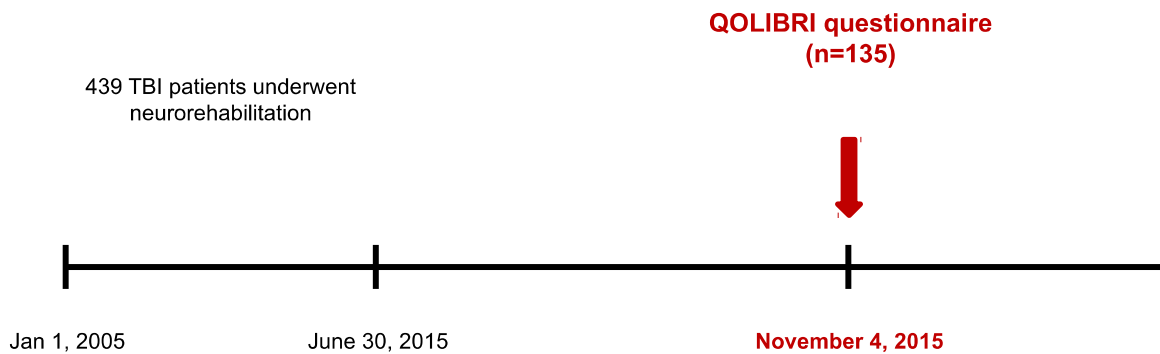

Supplement: MOESM1 [file 18051000]
